# Supplementary material for: Parental exposure to TiO2NPs promotes the multigenerational reproductive toxicity of Cd inCaenorhabditis elegans viabioaccumulation of Cd in germ cells
Source: Royal Society of Chemistry journal article supplement (doi:10.1039/c8en01042k), 2019-01-01

## Supporting information

### **Parental exposure to TiO<sub>2</sub> NPs promotes the multigenerational reproductive toxicity of cadmium in *Caenorhabditis elegans* via accumulation of Cd in germ cells**

Jingjing Wang,<sup>a,c</sup> Yaguang Nie,<sup>a,b</sup> Hui Dai,<sup>a</sup> Mudi Wang,<sup>a</sup> Lei Cheng,<sup>a,c</sup> Zhen Yang,<sup>a</sup> Shaopeng Chen,<sup>a</sup> Guoping Zhao,<sup>a</sup> Lijun Wu,<sup>a,b</sup> Shouhong Guang,<sup>d</sup> and An Xu<sup>\*,a,b</sup>

<sup>a</sup>Key Laboratory of High Magnetic Field and Ion Beam Physical Biology, Chinese Academy of Sciences; Anhui Province Key Laboratory of Environmental Toxicology and Pollution Control Technology, Hefei Institutes of Physical Science, Chinese Academy of Sciences, Hefei, Anhui 230031, P. R. China

<sup>b</sup>Institutes of Physical Science and Information Technology, An Hui University, Hefei, Anhui, 230601, P. R. China

<sup>c</sup>School of Environmental Science and Optoelectronic Technology, University of Science and Technology of China, Hefei, Anhui 230026, P. R. China

<sup>d</sup>School of Life Sciences, University of Science and Technology of China, Hefei, Anhui 230027, P. R. China

\*Corresponding author:

An Xu, PhD

Institute of Technical Biology & Agriculture Engineering

Hefei Institutes of Physical Science, Chinese Academy of Sciences

Hefei 230031, Anhui, China P.O. Box 1138

Tel: 86-551-65593336. Fax: 86-551-65595670

E-mail address: anxu@ipp.ac.cn

Number of pages in Supporting information (including cover and reference): 9

Number of tables in supporting information: 1

Number of figures in supporting information: 6

Number of texts in supporting information: 1

## Experimental design

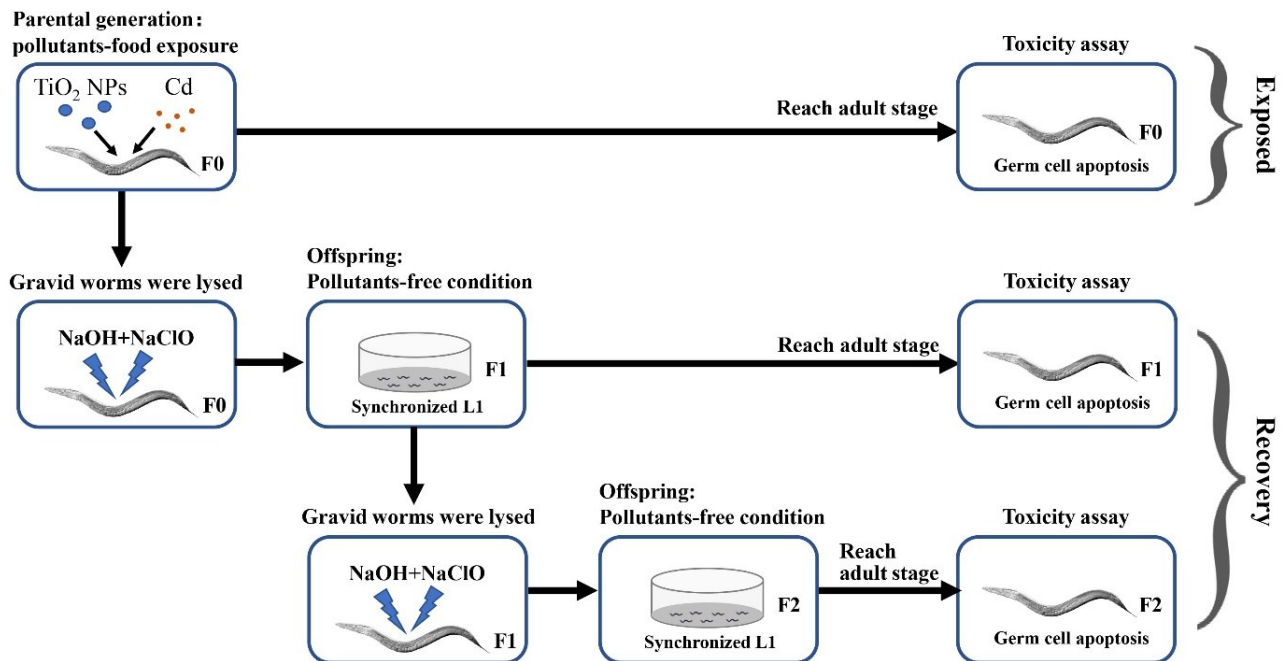

Figure S1. Experimental design for parental and filial generations of *C. elegans*.

## Primer sequences for PCR

Table S1. Primers sequences used for the qRT-PCR analyses

| <b>Gene</b>  | <b>Fw 5'-3'</b>      | <b>Rev 5'-3'</b>     | <b>Product length</b> | <b>Annealing T °C</b> | <b>NCBI Reference Sequence</b> |
|--------------|----------------------|----------------------|-----------------------|-----------------------|--------------------------------|
| <i>mtl-2</i> | TTCCTGCAACACCGGAATA  | GTTGGCACACTTGCATCCTC | 130                   | 59                    | NM_073418.5                    |
| <i>act-1</i> | GGTTGCCGCTCTTGTTGTAG | TCTCCGACGTACGAGTCCTT | 156                   | 60                    | NM_074081.5                    |

### **Text S1: The Details regarding operation conditions for LA-ICP-MS**

Bioimaging tests were performed at the Ore Deposit and Exploration Centre (ODEC), using a laser ablation system, coupled to a quadrupole-based inductively coupled plasma-mass spectrometer (ICP-MS) (Agilent 7900). The ICP-MS system was optimized daily to maximize sensitivity to isotopes of the mass range of interest, while maintaining the lowest possible production of molecular oxide species (i.e.,  $^{232}\text{Th}^{16}\text{O}/^{232}\text{Th}$ ), usually  $< 0.2\%$ . Element maps were created by ablating sets of parallel line rasters in a grid across the sample. A beam size of  $8\ \mu\text{m}$  and scan speed of  $8\ \mu\text{m/s}$  were chosen in this study. A laser repetition of 10 Hz was selected at a constant energy output of 80 mJ, resulting in an energy density of  $\sim 2\ \text{J/cm}^2$  at the target. A 20-s background acquisition was acquired at the beginning of scanning, and a delay of 20-s was used after ablation to allow for cell wash-out, gas stabilization, and computer processing. Reference materials NIST-610 or GSE-1G at the start and end of each mapping were analyzed for data calibration. Images were compiled and processed using the program LaIcpMsSoftWare2.2 (in-house designed mapping reduction software based on Matlab). For each raster and every element, the average background was subtracted from its corresponding raster, and the rasters were compiled into a 2-D image displaying the combined background/drift corrected intensity for each element.

## Workflow for Bioimaging

I. Sample preparation. After exposure, the worms were rinsed with pure water, and then transferred to microscopic slides and dried in an oven at 60 °C to obtain single, separated worms.

II. LA-ICP-MS measurement. Bioimaging tests were performed at the ODEC of Hefei University of Technology, using a laser ablation system coupled to a quadrupole-based ICP-MS.

III. Generation of images and quantification. Images were compiled and processed using the program LalcpMsSoftWare2.2.

### 1. Sample preparation

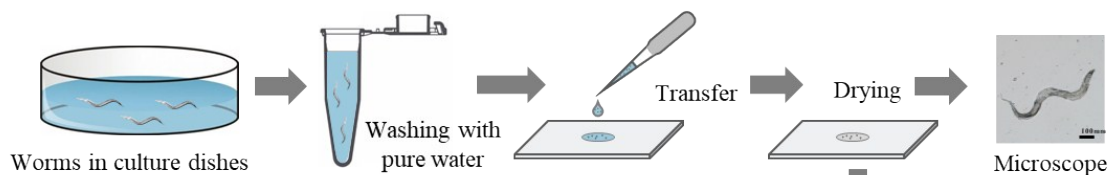

### 2. LA-ICP-MS measurement

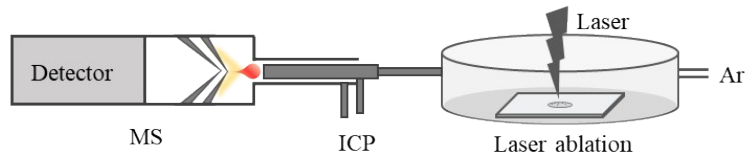

### 3. Generation of images and quantification

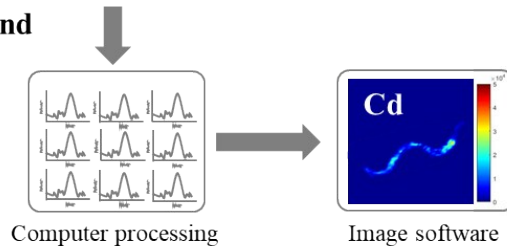

Figure S2. Overview of the workflow of the sample preparation and analysis process of LA-ICP-MS measurement.

## Acquisition of Intact Gonads of Nematodes

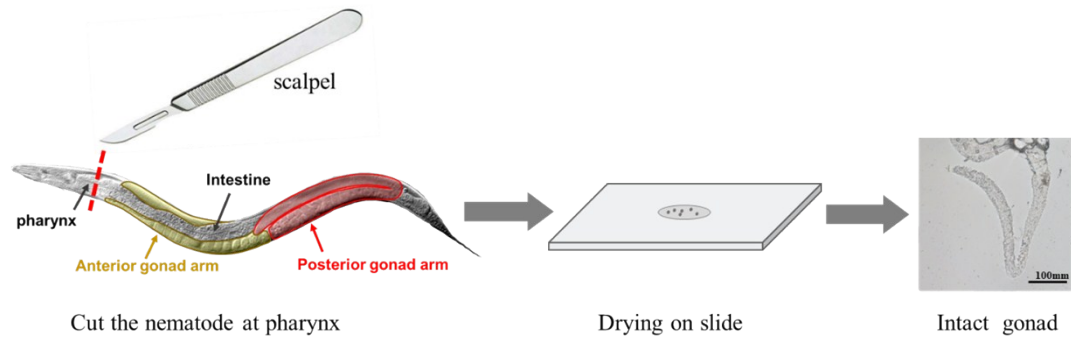

Figure S3. The method of obtaining the intact gonads of the *C. elegans*.

### Reproductive Toxicity of Cd Associated with TiO<sub>2</sub> NPs in *C. elegans*

The effect on reproduction is a basic parameter for evaluating the ecotoxicity of environmental pollutants. Synchronized L4 adult stage *C. elegans* were exposed to the mixture of 2 µg/mL TiO<sub>2</sub> and Cd (1 µg/mL) for 12 h to investigate the influence of TiO<sub>2</sub> NPs on Cd-induced.

Fluorescence microscope pictures showed that the presence of 5 nm TiO<sub>2</sub> promoted Cd-induced apoptosis in the meiosis region of nematode gonad (Figure S4).

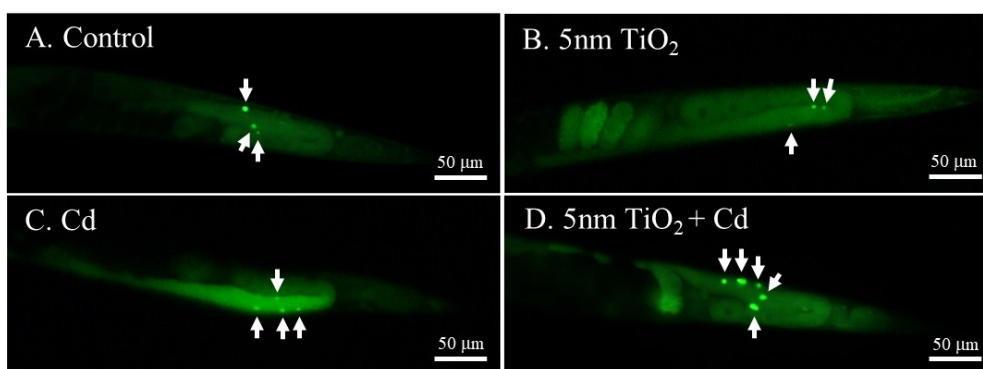

Figure S4. Representative fluorescence microscopy images of the germline cell apoptosis in *C. elegans* treated with (A) KM (control), (B) 5nm TiO<sub>2</sub>, (C) Cd, and (D) TiO<sub>2</sub> NPs + Cd. Apoptotic cells are indicated by white arrows.

## $\zeta$ potential of TiO<sub>2</sub> NPs

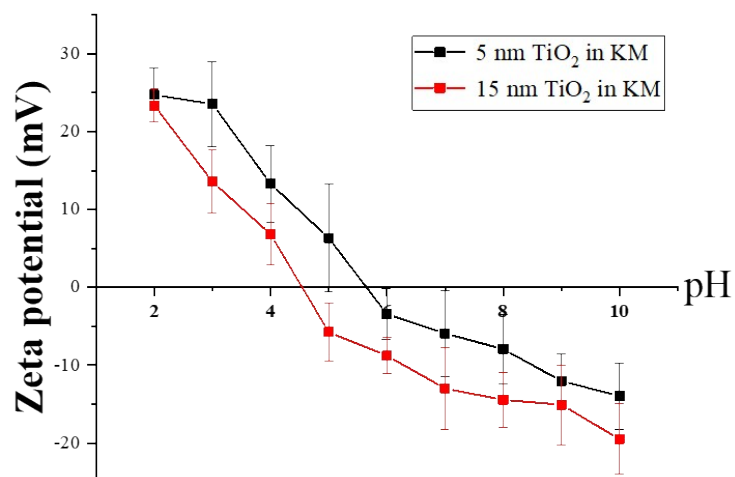

Figure S5.  $\zeta$  potential of 5 and 15 nm TiO<sub>2</sub> suspensions at different pH in KM.



## Spatial Distribution of Cd and Ti in *C. elegans*

Tissue-specific distribution of nanoparticles with co-contaminants could aid in our understanding of internal processes related to the accumulation of co-contaminants and thus further our understanding of their combined toxicity.

The lateral distribution of Cd and Ti in Figure S6A indicated that TiO<sub>2</sub> NPs were mainly concentrated in the gut, however, a considerable amount of Cd was detected in other parts of *C. elegans*, which was consistent with our speculations on the part of efflux experiment (Figure 3). Figure S6B showed that a large amount of TiO<sub>2</sub> NPs accumulated in pharyngeal pump, vulva and anus (Figure S6B).

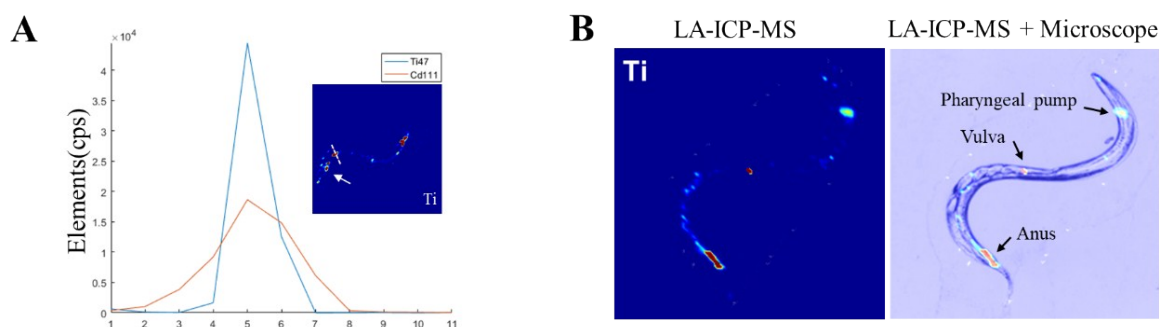

Supplement: c8en01042k1.pdf [file c8en01042k1.pdf]
